# Supplementary material for: Impact of Asian aerosols on the summer monsoon strongly modulated by regional precipitation biases
Source: Copernicus journal article supplement (doi:10.5194/egusphere-2023-3136), 2024-01-11
Supplement: Supplementary file [file egusphere-2023-3136-AC1-supplement.pdf]

1 Response to Review Comments

2

3 Dear Editor,

4

5 We thank you and both reviewers very much for their careful review and valuable  
6 comments on our manuscript. We have tried our best to address all concerns and revised  
7 the manuscript accordingly. Please note that the reviewer's remarks are in black, **our**  
8 **response** is highlighted in blue, and **extracts from the manuscript** are in red, with **new**  
9 **texts that have been added/edited** marked in bold. We hope that you find revised  
10 manuscript satisfactory. Thank you very much.

11

12 Kind regards,

13 Zhen LIU, on behalf of all co-authors

14

15 **Responses to Reviewer #1:**

16 **General comments:**

17 This article titled “Impact of Asian aerosols on the summer monsoon strongly  
18 modulated by regional precipitation biases” mainly discusses the challenges of the  
19 Asian summer monsoon to climate models, as well as the mutual influence between  
20 model bias and atmospheric circulation. However, can some updated data be provided  
21 in this manuscript?

22 *Response:* Thank you for the comments and suggestions. A point-by-point response is  
23 given below.

24 **Specific comments:**

25 1. Some images have a poor appearance, such as Figure 3 (g), and the arrows can be  
26 adjusted to be thinner. The colorbar can be further refined or a smooth one can be  
27 used, as many details cannot be displayed under the current colorbar.

28 *Response:* Thanks for your suggestions. The arrows are thinner for all vector plots in  
29 the revised manuscript. To keep consistency of all figures, we have carefully adjusted  
30 the colorbar scale, which considerably improves the readability of the plot. The figure  
31 below is the new Fig. 3.

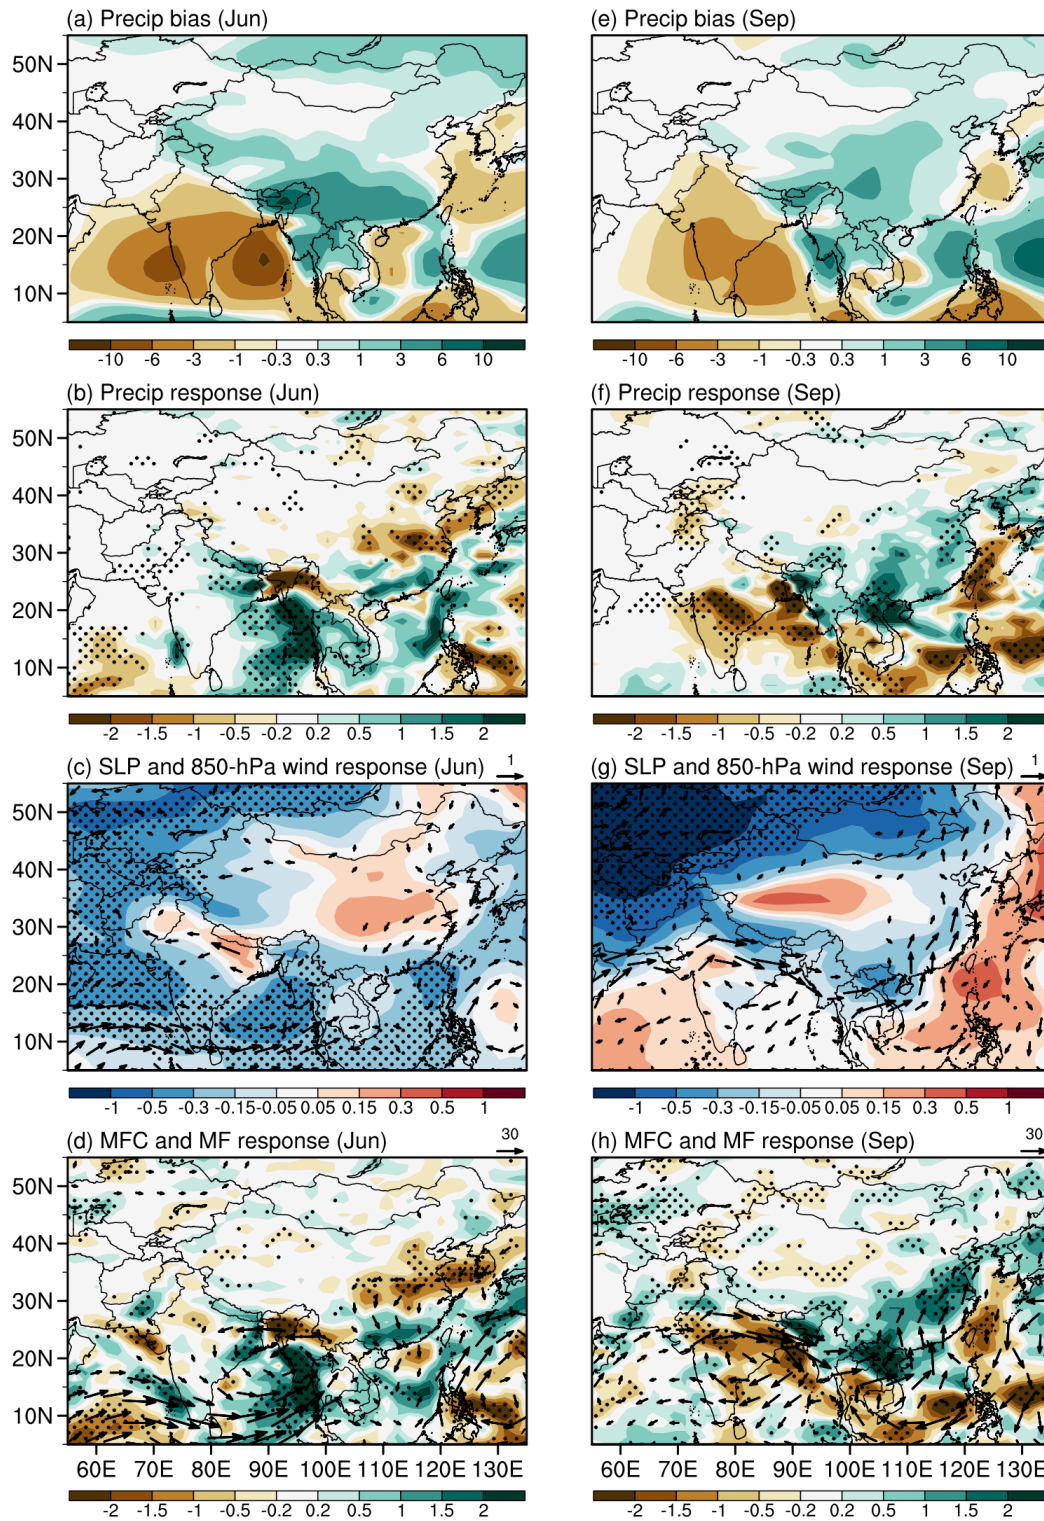

32

33

34

35

36

37

38

39

Fig. 3. (a) June precipitation bias ( $\text{mm day}^{-1}$ ) in CONT with respect to the mean of GPCP and CMAP. Model data are averaged over 2003–2012, observations over 1981–2010. June response to Asian anthropogenic aerosols (difference between CONT and CONTfa averaged during 2003–2012) for (b) precipitation ( $\text{mm day}^{-1}$ ), (c) sea-level pressure (hPa, shades) and 850-hPa wind ( $\text{m s}^{-1}$ ), and (d) 1000–300 hPa vertically integrated moisture flux convergence ( $\text{mm day}^{-1}$ , shades) and moisture flux ( $\text{kg m}^{-1} \text{s}^{-1}$ ). (e–h) Same as (a–d) but for September. Black dots in (b) and (f) mark grid-points for which the difference is significant at the 90% confidence level.

40 2. The dataset used in the article seems to lack a quantifiable validation of its  
 41 accuracy. A quantifiable validation is needed to evaluate its accuracy.  
 42 *Response:* Thanks for your suggestions. To provide a basic evaluation of the model  
 43 performance in simulating the key features of the Asian summer monsoon, Figure 1  
 44 compares the 1993-2012 June–September average precipitation and 850-hPa winds in  
 45 the control simulation to observations (GPCP and CMAP average for precipitation,  
 46 ERA5 for wind). The model reproduces the broad characteristics of the observed  
 47 rainfall and circulation patterns (pattern correlation of 0.80 for precipitation, which is  
 48 significant at the 99.9% confidence level). The difference panel indicates that the model  
 49 is too dry over India due to a weaker southwesterly monsoon flow, but features wet  
 50 anomalies over southwestern China and the northwestern subtropical Pacific associated  
 51 with enhanced cyclonic flow. Note that this bias pattern is common across CMIP6  
 52 models, although the magnitude of the anomalies vary from model to model (Wilcox et  
 53 al., 2020), and is also consistent with that in the historical simulations of the CMIP6  
 54 Met Office model (Rajendran et al., 2022). A thorough discussion of the model bias  
 55 and its linkage to regional and remote circulation are documented in Liu et al. (2021).  
 56 We have integrated this figure and related description in the main text as follows:

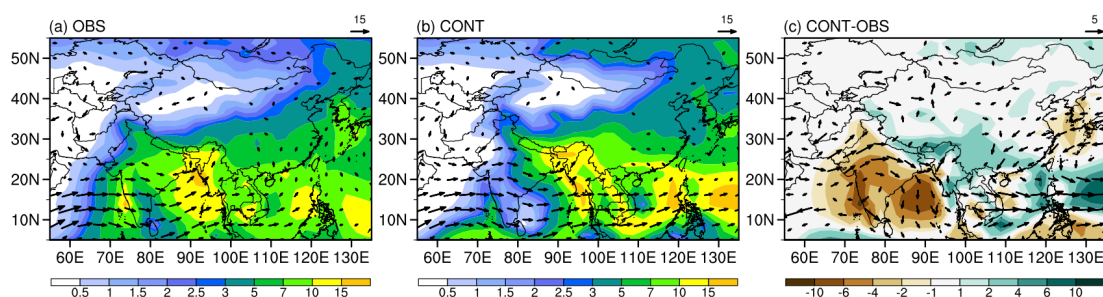

57  
 58 Figure 1. June–September average precipitation ( $\text{mm day}^{-1}$ ) and 850-hPa wind ( $\text{m s}^{-1}$ ) for the observations (GPCP  
 59 and CMAP average for precipitation, ERA5 for wind), the control simulation, and their differences (model  
 60 simulations minus observations) during the period 1993 to 2012.

61 **Lines 179–187: “Figure 1 compares the 1993-2012 June–September average**  
 62 **precipitation and 850-hPa winds in the control simulation to observations (GPCP**  
 63 **and CMAP average for precipitation, ERA5 for wind). The model reproduces the**  
 64 **broad characteristics of the observed rainfall and circulation patterns (pattern**  
 65 **correlation of 0.80 for precipitation, which is significant at the 99.9% confidence**

66 **level). The difference panel indicates that the model is too dry over India due to a**  
67 **weaker southwesterly monsoon flow, but features wet anomalies over**  
68 **southwestern China and the northwestern subtropical Pacific associated with**  
69 **enhanced cyclonic flow. Note that this bias pattern is common across CMIP6**  
70 **models, although the magnitude of the anomalies varies from model to model**  
71 **(Wilcox et al., 2020), and is also consistent with that in the historical simulations**  
72 **of the CMIP6 Met Office model (Rajendran et al., 2022). A thorough discussion of**  
73 **the model bias and its linkage to regional and remote circulation can be found in**  
74 **Liu et al. (2021).”**

75

76 3. The selection of parameters is usually a crucial step in model development and  
77 use, and the article seems to lack detailed explanation of the model's parameter  
78 settings.

79 *Response:* Thanks for your suggestions. We have provided more details on the selection  
80 of the model parameters.

81 *Lines 104–110:* “GA7.1 was used as the atmospheric component of the climate  
82 model participating in CMIP6, which reduces the overly negative global-mean  
83 anthropogenic aerosol effective radiative forcing in the previous model version,  
84 GA7.0 (Walters et al., 2019). A single-moment microphysics is used based on  
85 Wilson and Ballard (1999), with extensive improvement of the warm rain scheme  
86 (Boutle et al., 2014a, b). To account for aerosol-cloud interactions, the cloud  
87 droplet number concentration is calculated using prognostic aerosol  
88 concentration according to the UK Chemistry and Aerosol (UKCA)-Activate  
89 scheme (West et al., 2014). The atmospheric boundary layer and convection  
90 schemes are based on Lock et al. (2000) and Gregory and Rowntree (1990),  
91 respectively. A detailed description of the HadGEM3-GA7.1 physics is provided  
92 by Walters et al. (2019).”

93

94 Technical comments:

95 4. Line 53: “could albedo” → “cloud albedo”

96 *Response: Changed.*

97

98 5. Line 53: "cloud albedo and lifetime, and precipitation processes" → "cloud  
99 albedo, lifetime, and precipitation processes" There are other errors like this in the  
100 text, please check carefully

101 *Response: Thank you for spotting the error. We have gone through the whole*  
102 *manuscript carefully and revised it accordingly.*

103

104 6. Line 67: "South and East Asian aerosols separately exert a strong  
105 influence" → "South and East Asian aerosols exert a strong influence separately"

106 *Response: Thank you for your comment. Here, we are trying to say that either South or*  
107 *East Asian aerosols can affect both the South and East Asian monsoons. Sorry for the*  
108 *confusion. We revised the sentence as follows:*

109 *Lines 67–69: "In particular, **either South or East Asian aerosols can exert a strong***  
110 *influence on both the South and East Asian monsoons, with contrasting, if not opposite,*  
111 *changes as well as strong non-linear interactions between the responses to individual*  
112 *emission sources."*

113

114 7. Line 72: "the Asian monsoon march" There is a spelling error or misuse of  
115 vocabulary here.

116 *Response: We revise the word "march" to "progression".*

117

118 8. Line 141: "in coupled mode ((Liu et al., 2018)." → "in coupled mode (Liu et al.,  
119 2018)."

120 *Response: Done.*

121

122 9. Line 218: "Inspection of monthly precipitation and low-level circulation changes  
123 reveals a stark contrast over the Indian subcontinent and adjacent ocean between the  
124 early and late monsoon season: increased precipitation and anomalous cyclonic flow  
125 over the BOB in June, consistent with the seasonal mean, and decreased precipitation

126 and anomalous anticyclonic winds over India in September (Figs. S2 and S3)." This  
127 sentence may be too long, consider splitting it into two or more concise sentences.

128 *Response:* Thanks for your suggestions. We split it into three sentences:

129 *Lines 239–242:* “**Inspection of monthly precipitation and low-level circulation changes**  
130 **reveals a stark contrast over the Indian subcontinent and adjacent ocean between the**  
131 **early and late monsoon season (Figs. S2 and S3). In June, **there is** increased**  
132 **precipitation and anomalous cyclonic flow over the BOB, consistent with the seasonal**  
133 **mean. **On the contrary,** decreased precipitation and anomalous anticyclonic winds **are****  
134 **seen over India in September.”**

135

136 10. Line 241: "The accuracy of the simulated regional climate change signal and its  
137 attribution to anthropogenic drivers have been suggested to be strongly dependent on  
138 the model performance in reproducing the corresponding mean climatological  
139 conditions, which represent the baseline state on top of which changes occur  
140 (Matsueda and Palmer, 2011; Christidis et al., 2013)." → “has been”

141 *Response:* Per your suggestions.

142

143 11. Line 452: "For consistency with the analysis of the fixed SST experiments" →  
144 "For consistency with the analysis of the experiments with fixed SST"

145 *Response:* Per your suggestions.

146

147

148 **References**

149 Boutle, I. A., Eyre, J. E. J., and Lock, A. P.: Seamless Stratocumulus Simulation across the Turbulent  
150 Gray Zone, *Monthly Weather Review*, 142, 1655–1668, <https://doi.org/10.1175/MWR-D-13-00229.1>,  
151 2014a.

152 Boutle, I. A., Abel, S. J., Hill, P. G., and Morcrette, C. J.: Spatial variability of liquid cloud and rain:  
153 observations and microphysical effects, *Quarterly Journal of the Royal Meteorological Society*, 140,  
154 583–594, <https://doi.org/10.1002/qj.2140>, 2014b.

155 Gregory, D. and Rowntree, P. R.: A Mass Flux Convection Scheme with Representation of Cloud  
156 Ensemble Characteristics and Stability-Dependent Closure, *Monthly Weather Review*, 118, 1483–1506,  
157 [https://doi.org/10.1175/1520-0493\(1990\)118<1483:AMFCSW>2.0.CO;2](https://doi.org/10.1175/1520-0493(1990)118<1483:AMFCSW>2.0.CO;2), 1990.

158 Liu, Z., Bolasina, M. A., Wilcox, L. J., Rodríguez, J. M., and Regayre, L. A.: Contrasting the Role of  
159 Regional and Remote Circulation in Driving Asian Monsoon Biases in MetUM GA7.1, *Journal of*  
160 *Geophysical Research: Atmospheres*, 126, <https://doi.org/10.1029/2020JD034342>, 2021.

161 Lock, A. P., Brown, A. R., Bush, M. R., Martin, G. M., and Smith, R. N. B.: A New Boundary Layer  
162 Mixing Scheme. Part I: Scheme Description and Single-Column Model Tests, *Monthly Weather Review*,  
163 128, 3187–3199, [https://doi.org/10.1175/1520-0493\(2000\)128<3187:ANBLMS>2.0.CO;2](https://doi.org/10.1175/1520-0493(2000)128<3187:ANBLMS>2.0.CO;2), 2000.

164 Rajendran, K., Surendran, S., Varghese, S. J., and Sathyanath, A.: Simulation of Indian summer monsoon  
165 rainfall, interannual variability and teleconnections: evaluation of CMIP6 models, *Climate Dynamics*,  
166 <https://doi.org/10.1007/s00382-021-06027-w>, 2022.

167 Walters, D., Baran, A. J., Boutle, I., Brooks, M., Earnshaw, P., Edwards, J., Furtado, K., Hill, P., Lock,  
168 A., Manners, J., Morcrette, C., Mulcahy, J., Sanchez, C., Smith, C., Stratton, R., Tennant, W., Tomassini,  
169 L., Van Weverberg, K., Vosper, S., Willett, M., Browse, J., Bushell, A., Carslaw, K., Dalvi, M., Essery,  
170 R., Gedney, N., Hardiman, S., Johnson, B., Johnson, C., Jones, A., Jones, C., Mann, G., Milton, S.,  
171 Rumbold, H., Sellar, A., Ujiie, M., Whittall, M., Williams, K., and Zerroukat, M.: The Met Office Unified  
172 Model Global Atmosphere 7.0/7.1 and JULES Global Land 7.0 configurations, *Geoscientific Model*  
173 *Development*, 12, 1909–1963, <https://doi.org/10.5194/gmd-12-1909-2019>, 2019.

174 West, R. E. L., Stier, P., Jones, A., Johnson, C. E., Mann, G. W., Bellouin, N., Partridge, D. G., and  
175 Kipling, Z.: The importance of vertical velocity variability for estimates of the indirect aerosol effects,  
176 *Atmospheric Chemistry and Physics*, 14, 6369–6393, <https://doi.org/10.5194/acp-14-6369-2014>, 2014.

177 Wilcox, L. J., Liu, Z., Samset, B. H., Hawkins, E., Lund, M. T., Nordling, K., Undorf, S., Bolasina, M.,  
178 Ekman, A. M. L., Krishnan, S., Merikanto, J., and Turner, A. G.: Accelerated increases in global and  
179 Asian summer monsoon precipitation from future aerosol reductions, *Atmospheric Chemistry and*  
180 *Physics*, <https://doi.org/10.5194/acp-20-11955-2020>, 2020.



181 Wilson, D. R. and Ballard, S. P.: A microphysically based precipitation scheme for the UK  
182 meteorological office unified model, Quarterly Journal of the Royal Meteorological Society, 125, 1607–  
183 1636, <https://doi.org/10.1002/qj.49712555707>, 1999.

184
